# Supplementary material
Source: publisher figshare collection journal article supplement (https://acs.figshare.com/ndownloader/files/14863997)

## checkCIF/PLATON report

You have not supplied any structure factors. As a result the full set of tests cannot be run.

THIS REPORT IS FOR GUIDANCE ONLY. IF USED AS PART OF A REVIEW PROCEDURE FOR PUBLICATION, IT SHOULD NOT REPLACE THE EXPERTISE OF AN EXPERIENCED CRYSTALLOGRAPHIC REFEREE.

No syntax errors found.      CIF dictionary      Interpreting this report

### Datablock: 4777447447

---

Bond precision:    I- O = 0.0152 A                      Wavelength=0.71073

Cell:                      a=30.02(4)              b=10.205(13)              c=7.762(10)  
                            alpha=90              beta=103.786(15)              gamma=90  
Temperature:              296 K

|                | Calculated                         | Reported        |
|----------------|------------------------------------|-----------------|
| Volume         | 2309(5)                            | 2310(5)         |
| Space group    | C c                                | Cc              |
| Hall group     | : C -2yc                           | ?               |
| Moiety formula | I8 Mo8 O48, 3.802(Rb),<br>4.198(K) | ?               |
| Sum formula    | I8 K4.20 Mo8 O48 Rb3.80            | I2 K Mo2 O12 Rb |
| Mr             | 3039.82                            | 762.25          |
| Dx,g cm-3      | 4.372                              | 4.384           |
| Z              | 2                                  | 8               |
| Mu (mm-1)      | 11.937                             | 12.122          |
| F000           | 2728.9                             | 2736.0          |
| F000'          | 2689.78                            |                 |
| h,k,lmax       | 38,13,10                           | 38,13,9         |
| Nref           | 5300[ 2653]                        | 4475            |
| Tmin,Tmax      |                                    | 0.575,0.746     |
| Tmin'          |                                    |                 |

Correction method= # Reported T Limits: Tmin=0.575 Tmax=0.746  
AbsCorr = MULTI-SCAN

Data completeness= 1.69/0.84                      Theta(max)= 27.510

R(reflections)= 0.0534( 3907)                      wR2(reflections)= 0.1195( 4475)

S = 1.049                      Npar= 327

---

The following ALERTS were generated. Each ALERT has the format

**test-name\_ALERT\_alert-type\_alert-level.**

Click on the hyperlinks for more details of the test.

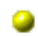

### Alert level C

ABSTY02\_ALERT\_1\_C An `_exptl_absorpt_correction_type` has been given without  
a literature citation. This should be contained in the  
`_exptl_absorpt_process_details` field.  
Absorption correction given as multi-scan

STRVA01\_ALERT\_4\_C Flack test results are meaningless.  
From the CIF: `_refine_ls_abs_structure_Flack` 0.000  
From the CIF: `_refine_ls_abs_structure_Flack_su` 10.000

PLAT029\_ALERT\_3\_C `_diffraction_measured_fraction_theta_full` value Low . 0.977 Why?  
PLAT041\_ALERT\_1\_C Calc. and Reported SumFormula Strings Differ Please Check  
PLAT043\_ALERT\_1\_C Calculated and Reported Mol. Weight Differ by .. 9.18 Check  
PLAT051\_ALERT\_1\_C Mu(calc) and Mu(CIF) Ratio Differs from 1.0 by . 1.53 %  
PLAT053\_ALERT\_1\_C Minimum Crystal Dimension Missing (or Error) ... Please Check  
PLAT054\_ALERT\_1\_C Medium Crystal Dimension Missing (or Error) ... Please Check  
PLAT055\_ALERT\_1\_C Maximum Crystal Dimension Missing (or Error) ... Please Check  
PLAT068\_ALERT\_1\_C Reported F000 Differs from Calcd (or Missing)... Please Check  
PLAT077\_ALERT\_4\_C Unitcell Contains Non-integer Number of Atoms .. Please Check  
PLAT148\_ALERT\_3\_C s.u. on the a - Axis is (Too) Large .... 0.040 Ang.  
PLAT148\_ALERT\_3\_C s.u. on the b - Axis is (Too) Large .... 0.0130 Ang.  
PLAT148\_ALERT\_3\_C s.u. on the c - Axis is (Too) Large .... 0.010 Ang.  
PLAT213\_ALERT\_2\_C Atom I4 has ADP max/min Ratio ..... 3.6 prolat  
PLAT213\_ALERT\_2\_C Atom O5 has ADP max/min Ratio ..... 3.1 prolat  
PLAT213\_ALERT\_2\_C Atom O8 has ADP max/min Ratio ..... 3.4 prolat  
PLAT213\_ALERT\_2\_C Atom O10 has ADP max/min Ratio ..... 3.1 prolat  
PLAT213\_ALERT\_2\_C Atom O22 has ADP max/min Ratio ..... 3.6 prolat  
PLAT213\_ALERT\_2\_C Atom O23 has ADP max/min Ratio ..... 3.8 prolat  
PLAT220\_ALERT\_2\_C Non-Solvent Resd 1 I Ueq(max)/Ueq(min) Range 3.9 Ratio  
PLAT220\_ALERT\_2\_C Non-Solvent Resd 1 O Ueq(max)/Ueq(min) Range 4.6 Ratio  
PLAT242\_ALERT\_2\_C Low 'MainMol' Ueq as Compared to Neighbors of Mo3 Check

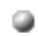

### Alert level G

FORMU01\_ALERT\_2\_G There is a discrepancy between the atom counts in the  
`_chemical_formula_sum` and the formula from the `_atom_site*` data.  
Atom count from `_chemical_formula_sum`: I2 K1 Mo2 O12 Rb1  
Atom count from the `_atom_site` data: I2 K1.0495 Mo2 O12 Rb0.9505

CELLZ01\_ALERT\_1\_G Difference between formula and atom\_site contents detected.

CELLZ01\_ALERT\_1\_G ALERT: Large difference may be due to a  
symmetry error - see SYMMG tests  
From the CIF: `_cell_formula_units_Z` 8  
From the CIF: `_chemical_formula_sum` I2 K Mo2 O12 Rb  
TEST: Compare cell contents of formula and atom\_site data

| atom | Z*formula | cif sites | diff  |
|------|-----------|-----------|-------|
| I    | 16.00     | 16.00     | 0.00  |
| K    | 8.00      | 8.40      | -0.40 |
| Mo   | 16.00     | 16.00     | 0.00  |
| O    | 96.00     | 96.00     | 0.00  |
| Rb   | 8.00      | 7.60      | 0.40  |

PLAT003\_ALERT\_2\_G Number of Uiso or Uij Restrained non-H Atoms ... 3 Report  
PLAT004\_ALERT\_5\_G Polymeric Structure Found with Maximum Dimension 3 Info  
PLAT005\_ALERT\_5\_G No Embedded Refinement Details Found in the CIF Please Do !  
PLAT032\_ALERT\_4\_G Std. Uncertainty on Flack Parameter Value High . 10.000 Report  
PLAT045\_ALERT\_1\_G Calculated and Reported Z Differ by a Factor ... 0.25 Check  
PLAT083\_ALERT\_2\_G SHELXL Second Parameter in WGHT Unusually Large 47.36 Why ?  
PLAT128\_ALERT\_4\_G Alternate Setting for Input Space Group Cc Ia Note

|                   |                                                 |       |        |
|-------------------|-------------------------------------------------|-------|--------|
| PLAT302_ALERT_4_G | Anion/Solvent/Minor-Residue Disorder (Resd 3 )  | 100%  | Note   |
| PLAT302_ALERT_4_G | Anion/Solvent/Minor-Residue Disorder (Resd 4 )  | 100%  | Note   |
| PLAT302_ALERT_4_G | Anion/Solvent/Minor-Residue Disorder (Resd 5 )  | 100%  | Note   |
| PLAT302_ALERT_4_G | Anion/Solvent/Minor-Residue Disorder (Resd 6 )  | 100%  | Note   |
| PLAT395_ALERT_2_G | Deviating X-O-Y Angle From 120 for O24          | 125.4 | Degree |
| PLAT794_ALERT_5_G | Tentative Bond Valency for Mo1 (VI)             | 6.10  | Info   |
| PLAT794_ALERT_5_G | Tentative Bond Valency for Mo2 (VI)             | 6.09  | Info   |
| PLAT794_ALERT_5_G | Tentative Bond Valency for Mo3 (VI)             | 6.33  | Info   |
| PLAT794_ALERT_5_G | Tentative Bond Valency for Mo4 (VI)             | 6.20  | Info   |
| PLAT850_ALERT_4_G | Check Flack Parameter Exact Value 0.00 and s.u. | 10.00 | Check  |
| PLAT860_ALERT_3_G | Number of Least-Squares Restraints .....        | 20    | Note   |
| PLAT899_ALERT_4_G | SHELXL97 is Deprecated and Succeeded by SHELXL  | 2018  | Note   |

---

0 **ALERT level A** = Most likely a serious problem - resolve or explain  
0 **ALERT level B** = A potentially serious problem, consider carefully  
23 **ALERT level C** = Check. Ensure it is not caused by an omission or oversight  
22 **ALERT level G** = General information/check it is not something unexpected

11 ALERT type 1 CIF construction/syntax error, inconsistent or missing data  
13 ALERT type 2 Indicator that the structure model may be wrong or deficient  
5 ALERT type 3 Indicator that the structure quality may be low  
10 ALERT type 4 Improvement, methodology, query or suggestion  
6 ALERT type 5 Informative message, check

---

It is advisable to attempt to resolve as many as possible of the alerts in all categories. Often the minor alerts point to easily fixed oversights, errors and omissions in your CIF or refinement strategy, so attention to these fine details can be worthwhile. In order to resolve some of the more serious problems it may be necessary to carry out additional measurements or structure refinements. However, the purpose of your study may justify the reported deviations and the more serious of these should normally be commented upon in the discussion or experimental section of a paper or in the "special\_details" fields of the CIF. checkCIF was carefully designed to identify outliers and unusual parameters, but every test has its limitations and alerts that are not important in a particular case may appear. Conversely, the absence of alerts does not guarantee there are no aspects of the results needing attention. It is up to the individual to critically assess their own results and, if necessary, seek expert advice.

### Publication of your CIF in IUCr journals

A basic structural check has been run on your CIF. These basic checks will be run on all CIFs submitted for publication in IUCr journals (*Acta Crystallographica*, *Journal of Applied Crystallography*, *Journal of Synchrotron Radiation*); however, if you intend to submit to *Acta Crystallographica Section C* or *E* or *IUCrData*, you should make sure that full publication checks are run on the final version of your CIF prior to submission.

### Publication of your CIF in other journals

Please refer to the *Notes for Authors* of the relevant journal for any special instructions relating to CIF submission.

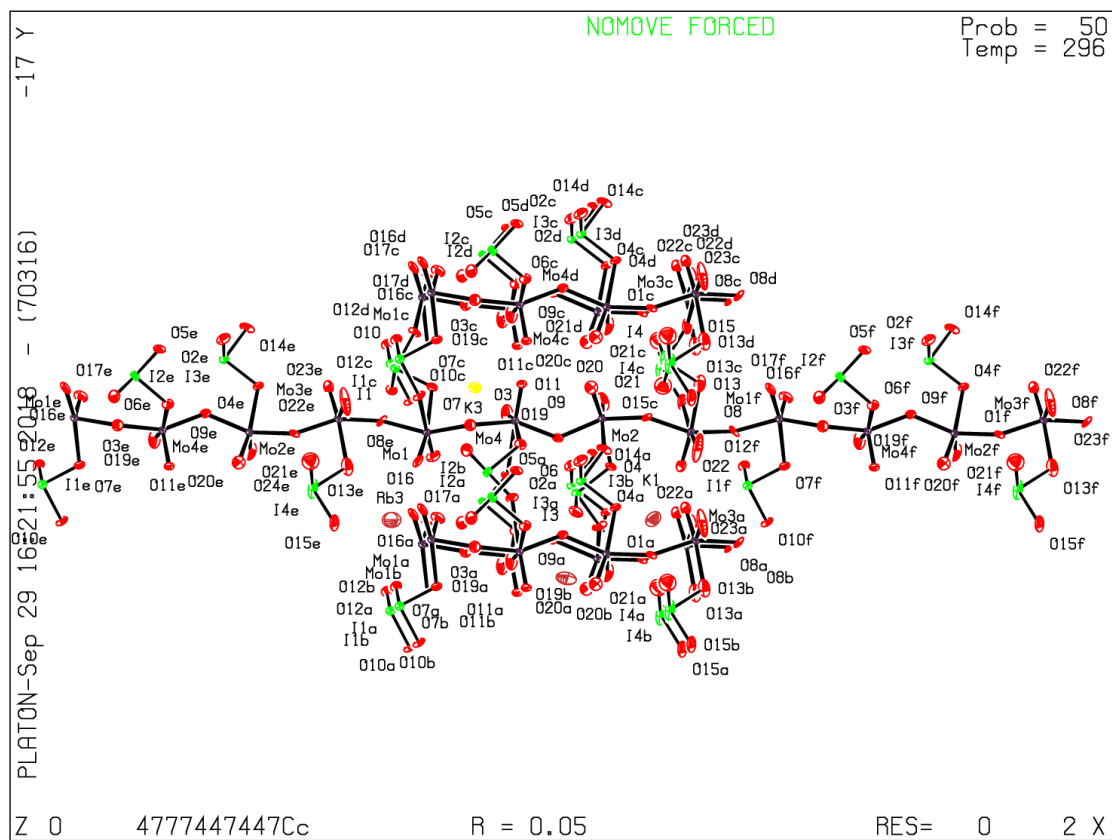

Supplement: Supplementary file 1 [file 14863997]
